# Supplementary material for: Ultrasmall amphiphilic zeolitic nanoreactors for the aerobic oxidation of alcohols in water
Source: Royal Society of Chemistry journal article supplement (doi:10.1039/d1nr00955a), 2021-01-01
Supplement: d1nr00955a1.pdf [file d1nr00955a1.pdf]

## **Ultrasmall Amphiphilic Zeolitic Nanoreactors for Aerobic Oxidation of Alcohols in Water**

Wendan Jing,<sup>a</sup> Hui Li,<sup>a</sup> Peiwen Xiao,<sup>b, c</sup> Bolun Liu,<sup>a</sup> Jianhui Luo,<sup>b, c</sup> Runwei Wang,<sup>a</sup>  
Shilun Qiu,<sup>a</sup> and Zongtao Zhang\*,<sup>a</sup>

<sup>a</sup> State Key Laboratory of Inorganic Synthesis and Preparative Chemistry, Jilin University, Changchun 130012, P. R. China

<sup>b</sup> Research Institute of Petroleum Exploration & Development, PetroChina, Beijing 100083, P. R. China

<sup>c</sup> Key Laboratory of Nano Chemistry (KLNC), CNPC, Beijing 100083, P. R. China

## **Chemicals and reagents**

Tetrapropylammonium hydroxide (TPAOH, 25 wt. % aqueous solution), n-Hexadecane (>99.0%), and 3-Aminopropyltriethoxysilane (APTES, >98.0%) were purchased from Aladdin Chemicals, China. Tetraethyl orthosilicate (TEOS, AR), Sodium hydroxide (NaOH, AR), Aluminium isopropoxide (AR), Toluene (AR), Trichloromethane (AR), Ethanol (AR), Sodium chloride (NaCl, AR), Ethyl acetate (AR), and Sodium tetrachloropalladate (II) ( $\text{Na}_2\text{PdCl}_4$ ) were purchased from Sinopharm Chemical Reagent Co., Ltd., China. Phenyltrimethoxysilane (PTMS, >98%) were purchased from Tokyo Chemical Industry Co., Ltd., China. All alcohols were purchased from Aladdin. All chemicals were used as received without further purification. The water (>18.2 M $\Omega$  cm) was obtained from a Millipore-Q water purification system (Millipore, USA) in this work.

### **Preparation of the lipophilic ZSM-5 (liZSM-5) zeolites.**

The as-obtained ultrasmall ZSM-5 zeolites (1.0 g) were homogeneously dispersed into toluene (50.0 mL). Then, PTMS was added to the toluene suspension. After magnetic stirring at 80 °C for 4 h, the liZSM-5 zeolites were obtained through centrifugation and then washed three times with trichloromethane.

### **Preparation of the Pd@hyZSM-5 nanoreactors.**

Pd@hyZSM-5 nanoreactors were prepared according to the above method by replacing amZSM-5 zeolites with hyZSM-5 zeolites.

### **Preparation of the Pd@liZSM-5 nanoreactors.**

Pd@liZSM-5 nanoreactors were prepared according to the above method by replacing amZSM-5 zeolites with liZSM-5 zeolites.

### **Interfacial activity test**

25 mg of the amZSM-5 zeolites were added into a 25 mL colorimetric tube with 10 mL of NaCl aqueous (1 M) and 10 mL of n-hexadecane. The emulsion was obtained by sonicating for 30 s and vigorously stirring.

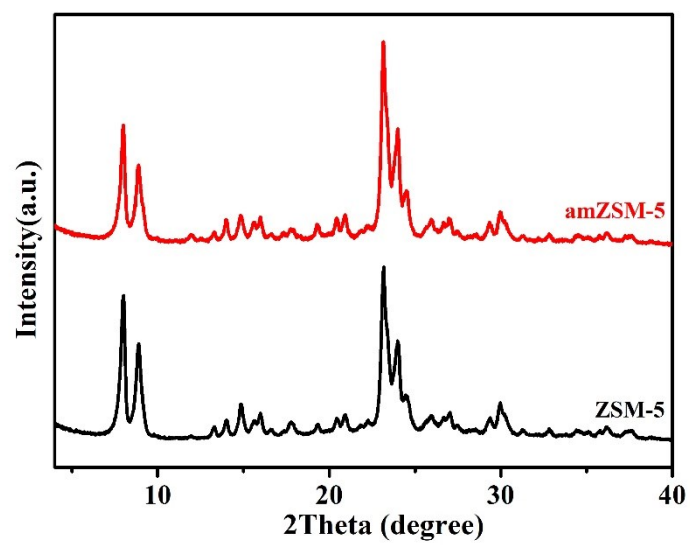

**Figure S1.** Wide-angle XRD patterns of ZSM-5 and amZSM-5 zeolites.

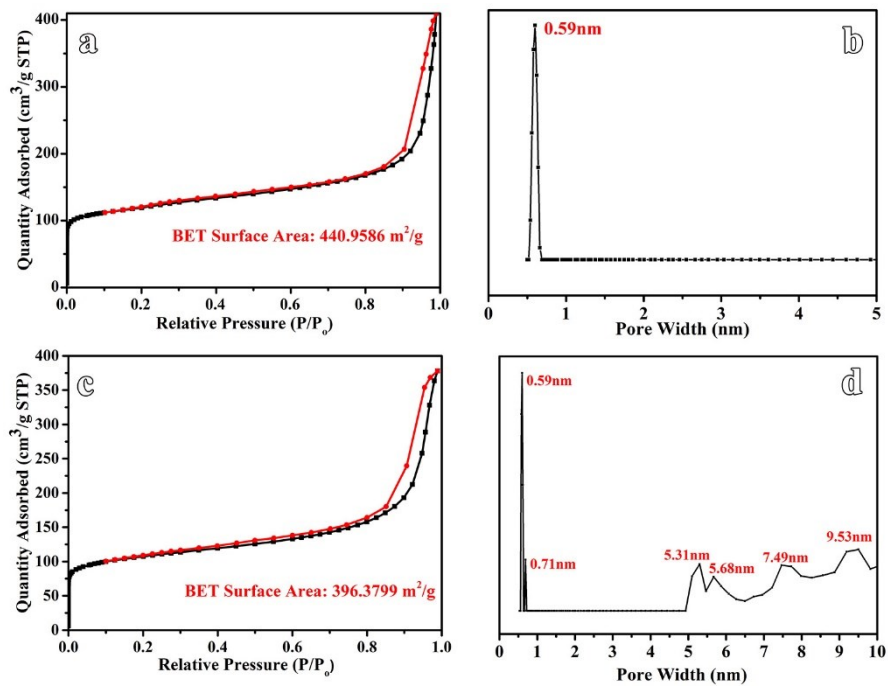

**Figure S2.** N<sub>2</sub> sorption isotherms (a, c), and the pore size distributions (b, d) of the ZSM-5 zeolites (a, b) and amZSM-5 zeolites (c, d).

**Table S1.** Physical properties of the ultrasmall ZSM-5 zeolites, and amZSM-5 zeolites.

| <b>Sample</b>                    | <b>BET Surface Area (m<sup>2</sup>/g)</b> | <b>Micropore Area (m<sup>2</sup>/g)</b> | <b>External Surface Area (m<sup>2</sup>/g)</b> | <b>Pore Volume (cm<sup>3</sup>/g)</b> | <b>Micropore Size (nm)</b> | <b>Mesopore Size (nm)</b> |
|----------------------------------|-------------------------------------------|-----------------------------------------|------------------------------------------------|---------------------------------------|----------------------------|---------------------------|
| <b>Ultrasmall ZSM-5 zeolites</b> | 440.9586                                  | 263.8625                                | 177.0960                                       | 0.635260                              | 0.59                       | -                         |
| <b>amZSM-5 zeolites</b>          | 396.3799                                  | 229.9724                                | 166.4075                                       | 0.585909                              | 0.59                       | 5.31                      |

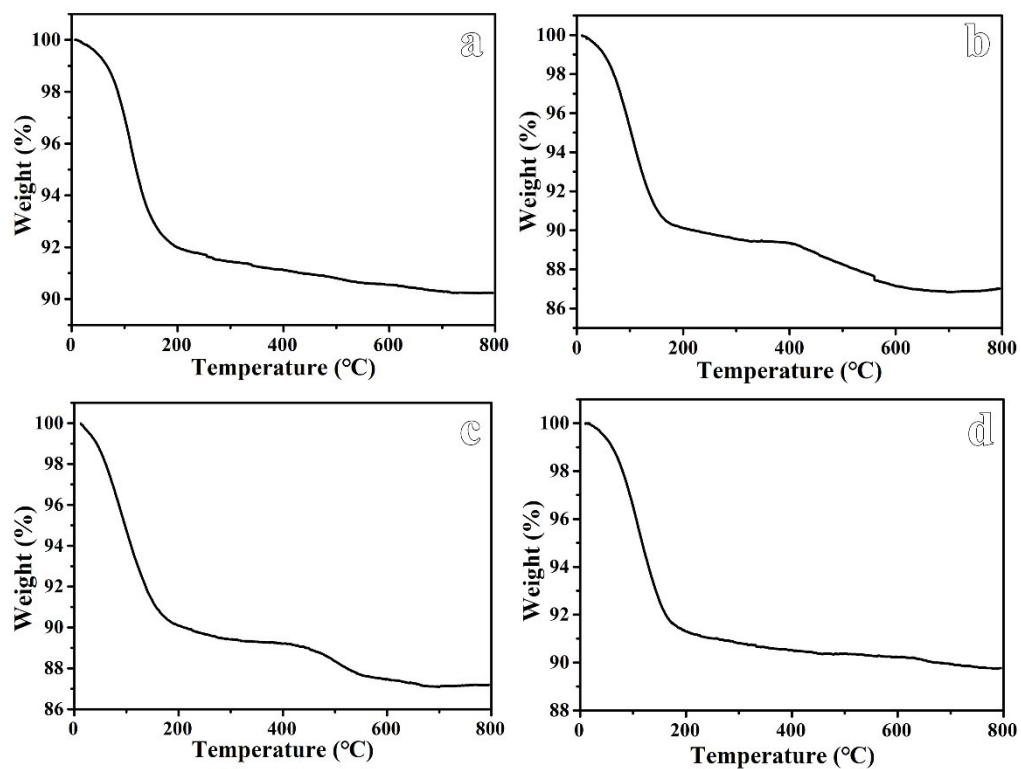

**Figure S3.** TGA curves of hyZSM-5 zeolites after low concentration alkali etching (a), amZSM-5 (b), hyZSM-5 (c), and liZSM-5 nanoreactors (d).

**Table S2.** Thermogravimetric analysis results of the amZSM-5 zeolites, hyZSM-5 zeolites, and liZSM-5 zeolites.

|                         | <b>aminopropyl groups (mmol/g)</b> | <b>phenyl groups (mmol/g)</b> |
|-------------------------|------------------------------------|-------------------------------|
| <b>amZSM-5 zeolites</b> | 0.1219                             | 0.1158                        |
| <b>hyZSM-5 zeolites</b> | 0.1947                             | -                             |
| <b>liZSM-5 zeolites</b> | -                                  | 0.1167                        |

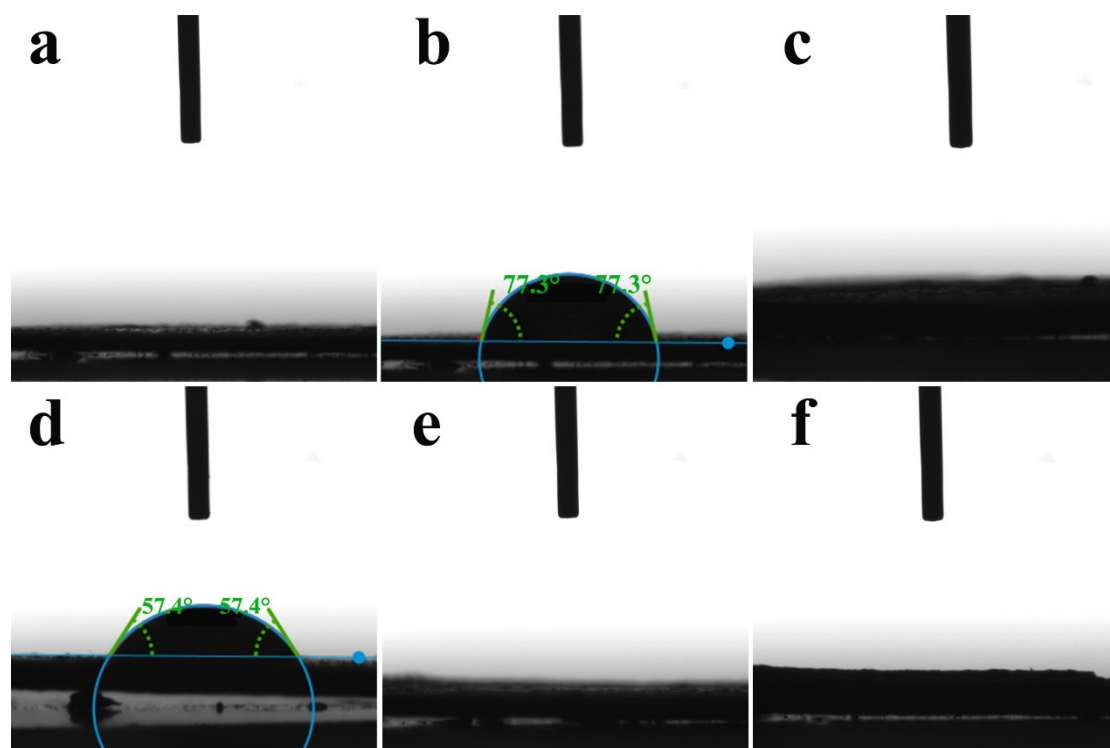

**Figure S4.** Water-solid-air three phase contact angles (a, b, c) and oil-solid-air three phase contact angles (d, e, f) of the hyZSM-5 (a, d), liZSM-5 (b, e), and amZSM-5 (c, f) zeolites. The oil phase is hexadecane.



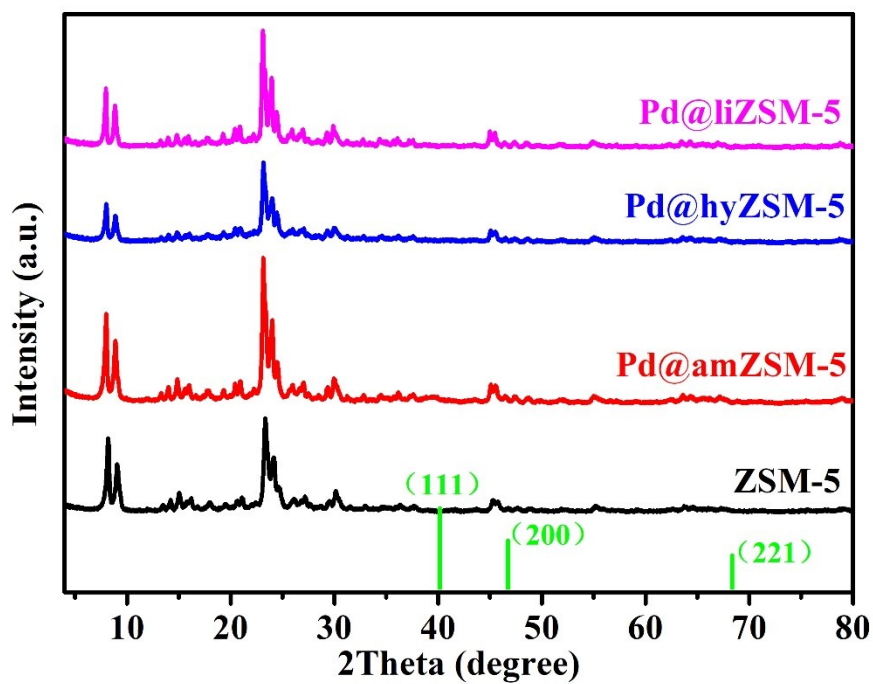

**Figure S5.** Wide-angle XRD patterns of ultrasmall ZSM-5, Pd@hyZSM-5, Pd@liZSM-5, and Pd@amZSM-5 composites.



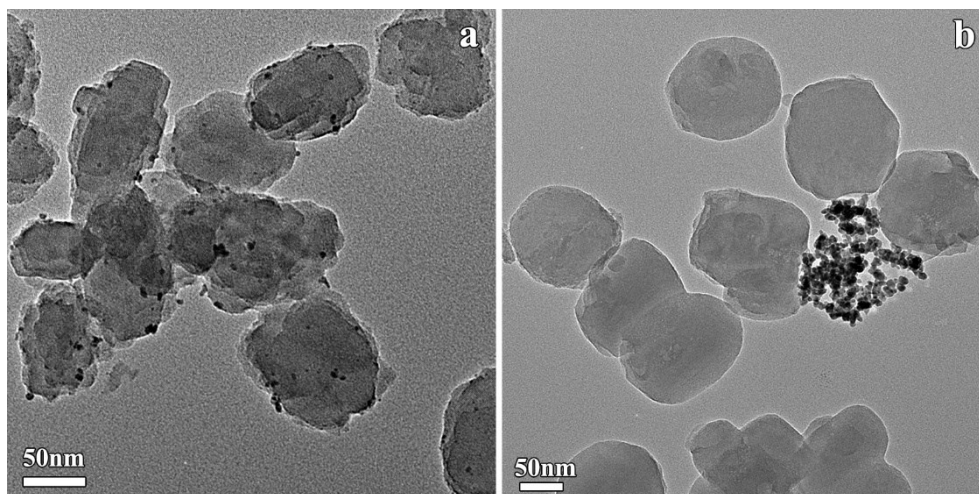

**Figure S7.** TEM images of Pd@hyZSM-5, and Pd@liZSM-5 nanoreactors.

**Table S3.** Catalytic results of various nanoparticle catalysts for the selective oxidation of alcohols.

| Entry | Reactant                                                                            | Catalyst                                                    | Reaction conditions                                                                            | Conv. /Sel. (%) | TOF[h <sup>-1</sup> ] | Ref       |
|-------|-------------------------------------------------------------------------------------|-------------------------------------------------------------|------------------------------------------------------------------------------------------------|-----------------|-----------------------|-----------|
| 1     | 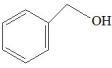   | AuCl                                                        | 4 mL H <sub>2</sub> O, 90°C, air                                                               | 100/99          | 0.67                  | 1         |
| 2     |    | Ru/CNT-TiO <sub>2</sub>                                     | 5 mL H <sub>2</sub> O, 10 mL toluene, 85°C, 0.1 MPa O <sub>2</sub>                             | 95/99           | 10.8                  | 2         |
| 3     |    | PS/Au <sub>1.25</sub> Pt <sub>1</sub>                       | H <sub>2</sub> O, air, 40°C                                                                    | 99/-            | 1.4                   | 3         |
| 4     |    | Au@P <sub>0</sub> PD-supported                              | K <sub>2</sub> CO <sub>3</sub> (3 equiv), room temperature, air, H <sub>2</sub> O              | 90/-            | 6.1                   | 4         |
| 5     |    | Au@Pd@Ph-PMO                                                | K <sub>2</sub> CO <sub>3</sub> (0.5 mmol, 1 equiv.), 4 mL H <sub>2</sub> O, open air, 80°C     | 100/96          | 13.5                  | 5         |
| 6     |    | Fe <sub>3</sub> O <sub>4</sub> @SiO <sub>2</sub> @Pd/HS-PMO | K <sub>2</sub> CO <sub>3</sub> (0.5 mmol, 1 equiv.), 4 mL H <sub>2</sub> O, open air, 80°C     | >99/>98         | 16.9                  | 6         |
| 7     |   | Pt/N <sub>x</sub> C@mSiO <sub>2</sub>                       | K <sub>2</sub> CO <sub>3</sub> (0.5 mmol, 1 equiv.), 4 mL H <sub>2</sub> O, open air, 80°C     | >99/>99         | 26.7                  | 7         |
| 8     |  | RuCl <sub>3</sub> @MIL-101(Cr)-tpy                          | H <sub>2</sub> O (5 mL), 100 °C, H <sub>2</sub> O <sub>2</sub> (0.75 mmol)                     | >99/>99         | 16.7                  | 8         |
| 9     |  | Pd@amZSM-5                                                  | 4 mL H <sub>2</sub> O, open air, 80°C                                                          | >99/>99         | 42.9                  | This work |
| 10    |  | Pd <sub>1</sub> Au <sub>24</sub> /CNT                       | K <sub>2</sub> CO <sub>3</sub> (80mol%), 10 mL H <sub>2</sub> O, 0.1 MPa O <sub>2</sub> , 30°C | 74/             | 57.1                  | 9         |

## References

1. B. Guan, D. Xing, G. Cai, X. Wan, N. Yu, Z. Fang, L. Yang and Z. Shi, *Journal of the American Chemical Society*, 2005, **127**, 18004-18005.
2. C. Yu, L. Fan, J. Yang, Y. Shan and J. Qiu, *Chemistry—A European Journal*, 2013, **19**, 16192-16195.
3. Y. Li, Y. Gao and C. Yang, *Chemical Communications*, 2015, **51**, 7721-7724.
4. J. Han, Y. Liu and R. Guo, *Advanced Functional Materials*, 2009, **19**, 1112-1117.
5. H. Zou, R. Wang, J. Dai, Y. Wang, X. Wang, Z. Zhang and S. Qiu, *Chemical Communications*, 2015, **51**, 14601-14604.
6. J. Dai, H. Zou, R. Wang, Y. Wang, Z. Shi and S. Qiu, *Green Chemistry*, 2017, **19**, 1336-1344.
7. J. Dai, H. Zou, Z. Shi, H. Yang, R. Wang, Z. Zhang and S. Qiu, *ACS applied materials & interfaces*, 2018, **10**, 33474-33483.
8. S. Wu, L. Chen, B. Yin and Y. Li, *Chemical Communications*, 2015, **51**, 9884-9887.
9. S. Xie, H. Tsunoyama, W. Kurashige, Y. Negishi and T. Tsukuda, *ACS Catalysis*, 2012, **2**, 1519-1523.
